# Supplementary material
Source: PubMed Central journal article supplement (PMC2041856)
Supplement: NIHMS25553-supplement-01.pdf [file NIHMS25553-supplement-01.pdf]

**Supplementary Material for**  
**A peptide signal for adapter protein mediated degradation by the AAA<sup>+</sup> protease ClpCP**

Peter Prepiak<sup>1</sup> and David Dubnau<sup>1\*</sup>

Public Health Research Institute  
225 Warren Street  
Newark, NJ 07103

<sup>1</sup>Public Health Research Institute, Newark, NJ 07103, USA

\*Corresponding author: Email, [dubnau@phri](mailto:dubnau@phri); Phone, 973-854-3400; Fax, 973-854-3401

## Strain and plasmid construction

To prepare a Campbell-like integration vector for alanine scanning mutagenesis, we used plasmid pUS19 (Benson and Haldenwang, 1993).. Primers CCOMKEH (5'-GGGG AAG CTT CGG ACA AGG CAC GCC GCC) and NCOMKSB (5'-GGGGATCC ATG AGT CAG AAA ACA GAC GC) were used to amplify the *comK* gene. The resulting PCR fragment was cleaved with *HindIII* and *BamHI* (restriction sites are underlined) and ligated into pUS19. The resulting plasmid was cleaved with *SalI* and *BamHI*, blunt ended with Klenow polymerase and self ligated, in order to remove first 150 nucleotides from 5' end of the gene. The product, pUS19ComK, was then used as a template for site directed mutagenesis. Individual plasmids, carrying mutations, were transformed into *B. subtilis* strain BD1959 (*amyE::comG-lacZ*, in-frame fusion) Mutations were verified by sequence analysis.

To create a system for the expression of *comK* under the control of the xylose-induced *pxyl* promoter, we utilized the construct *PxylA-comK* (Hahn et al., 1996). Plasmids carrying individual mutations were transformed into *B. subtilis* strain BD1826 (*comG-lacZ*, transcriptional fusion). To disrupt the expression of *comK* at the native locus, the resulting strains were transformed with chromosomal DNA from BD2259, carrying a mini*Tn10* insertion in the promoter of *comK* (Luttinger et al., 1996).

*PxylA-comK* was also used to construct the deletions ComK $\Delta$ (174-192) and ComK $\Delta$ (169-192). The plasmids carrying mutations as well as *PxylA-comK* were transformed into *B. subtilis* strain BD1826. Chromosomal DNA purified from the resulting strains was used to transform BD1826 by congression together with chromosomal DNA from strain BD4263 (*comK::spc*). The resulting *B. subtilis* strains, BD4310(wild type), BD4311 ( $\Delta$ 169-192) and BD4312 ( $\Delta$ 174-192) were then transduced (using phage SPP1) with DNA from BD2091 ( $\Delta$ *mecA::erm*) yielding strains BD4313 (*comK::spc amyE::comK* (wild type) *comG-lacZ*), BD4314 (*comK::spc amyE::comK $\Delta$ 174-192 comG-lacZ*) and BD4315 (*comK::spc amyE::comK $\Delta$ 168-192 comG-lacZ*). Strain BD4263 was created by transforming IS75 with chromosomal DNA from BV2004 (Hamoen et al., 2002).

To demonstrate targeted degradation, we appended the *comK* sequence at the 3' terminus of the coding sequence for GFP. GFP fusions were constructed using the integration vector pSG1729 (Lewis and Marston, 1999). A fusion of *gfp*-to the wild-type *comK* was constructed using primers CKGFPBAM (5'-GGC GG ATC CAC ATG AGT CAG AAA ACA GAC) and CKGFPHIND (5'-CG AGG AAG CTT CTA ATA CCG TTC CCC GAG CTC) and ligating the resulting PCR fragment into *BamHI* and *HindIII* (restriction sites are underlined) sites of pSG1729. A fusion of *gfp* to the C-terminal part of *comK* (pSG1729-GFP-C ) was constructed using primers CKCTGFPBAM (5'-GGC GG ATC CAC ATG TCT TCG ACA

AGA CCC CAA) and CKGFPHIND with ligating into *Bam*HI and *Hind*III sites of pSG1729. Fusions GFP-H160-R176 and GFP-R176-Y192 were created by deleting the corresponding parts from the construct pSG1729-GFP-C, using a QuikChange Mutagenesis kit (Stratagene). All constructed plasmid were then introduced into *B. subtilis* strain IS75 (*his leu met*) producing strains BD4316 (GFP-ComK), BD4317 (GFP-K17), BD4318 (GFP-R176-Y192) and BD4319 (GFP). In these strains *mecA* was disrupted by transformation with chromosomal DNA from BD2091 creating strains BD4320, BD4321, BD4322 and BD4323 respectively.

### **Cross-linking and AspN cleavage reactions**

Peptides K17BB and S17BB were mixed with equimolar amounts of K17Scramble and MecA, and cross-linked as described in Experimental Procedures. (The K17Scramble peptide was added to reduce non-specific binding). A negative control sample, MecA with K17Scramble, was handled the same way. The cross-linked samples were loaded on a Ni-NTA Superflow (Qiagen) column and washed with 50 mM sodium phosphate, pH 7.4, 400 mM NaCl. Samples were eluted with 400 mM imidazole and dialyzed against PBS. A total of 200 µg of cross-linked protein was cleaved with 1 µg of Asp-N protease (Sigma) at 37°C for 18 hours. The digested protein samples were mixed with streptavidin Magnesphere paramagnetic beads (Promega) previously equilibrated with PBS, and the binding reaction was continued for 1 hour at room temperature. Each sample was washed extensively with 5 ml of 50 mM sodium phosphate pH 7.4, 400 mM NaCl and 30 ml of PBS. 150 µl of SDS loading buffer was then added and the mixtures were incubated at 70°C for 5 minutes. Elution samples were resolved using 16% tris-tricine polyacrylamide gels and electroblotted onto Immobilon Psq PVDF membrane (Millipore) as described. (Persuh et al., 1999). To detect cross-linking of the biotin labeled K17BB and S17BB to MecA, the cross-linked proteins were probed used anti-biotin mouse IgG monoclonal 2F5 (Molecular Probes), at a dilution of 1:2000. Cross-linked protein fragments were N-terminally sequenced by the Protein Chemistry Core Facility of Columbia University, NY, USA.

Table1. Strains

| Strain        | Genotype                                                                                                               | Host strain            | Source     |
|---------------|------------------------------------------------------------------------------------------------------------------------|------------------------|------------|
| <b>BD4310</b> | <i>PxylA-comK wt::amyE(cat), comk::spc, comG-lacZ(kan)</i>                                                             | <i>B.subtilis</i> IS75 | This study |
| <b>BD4311</b> | <i>PxylA-comK (<math>\Delta</math> M169-Y192)::amyE(cat), comk::spc, comG-lacZ (kan)</i>                               | <i>B.subtilis</i> IS75 | This study |
| <b>BD4312</b> | <i>PxylA-comK (<math>\Delta</math> E174-Y192)::amyE(cat), comG-lacZ(kan)</i>                                           | <i>B.subtilis</i> IS75 | This study |
| <b>BD4313</b> | <i>PxylA-comK wt::amyE(cat), comk::spc, <math>\Delta</math>mecA(ery), comG-lacZ(kan)</i>                               | <i>B.subtilis</i> IS75 | This study |
| <b>BD4314</b> | <i>PxylA-comK (<math>\Delta</math> E174-Y192)::amyE, comk::spc, <math>\Delta</math>mecA(ery), comG-lacZ(kan)</i>       | <i>B.subtilis</i> IS75 | This study |
| <b>BD4315</b> | <i>PxylA-comK (<math>\Delta</math> M169-Y192)::amyE(cat), comk::spc, <math>\Delta</math>mecA(ery), comG-lacZ (kan)</i> | <i>B.subtilis</i> IS75 | This study |
| <b>BD4316</b> | <i>Pxyl-gfp-comK::amyE(spc)</i>                                                                                        | <i>B.subtilis</i> IS75 | This study |
| <b>BD4317</b> | <i>Pxyl-gfp-comK(H160-R176)::amyE(spc)</i>                                                                             | <i>B.subtilis</i> IS75 | This study |
| <b>BD4318</b> | <i>Pxyl-gfp-comK(R176-Y192)::amyE(spc)</i>                                                                             | <i>B.subtilis</i> IS75 | This study |
| <b>BD4319</b> | <i>Pxyl-gfp::amyE(spc)</i>                                                                                             | <i>B.subtilis</i> IS75 | This study |
| <b>BD4320</b> | <i>Pxyl-gfp-comK::amyE(spc), <math>\Delta</math>mecA(ery)</i>                                                          | <i>B.subtilis</i> IS75 | This study |
| <b>BD4321</b> | <i>Pxyl-gfp-comK(H160-R176)::amyE(spc), <math>\Delta</math>mecA(ery)</i>                                               | <i>B.subtilis</i> IS75 | This study |
| <b>BD4322</b> | <i>Pxyl-gfp-comK(R176-Y192)::amyE(spc), <math>\Delta</math>mecA(ery)</i>                                               | <i>B.subtilis</i> IS75 | This study |
| <b>BD4323</b> | <i>Pxyl-gfp::amyE(spc), <math>\Delta</math>mecA(ery)</i>                                                               | <i>B.subtilis</i> IS75 | This study |
| <b>ED1034</b> | pUB110::pT7T3 19U::comS (phleo)                                                                                        | <i>E.coli</i> DH5a     | This study |
| <b>BD4405</b> | <i>Pxyl-gfp-comK(H160-R176)::amyE(spc), <math>\Delta</math>comS(cat), <math>\Delta</math>comK(kan)</i>                 | <i>B.subtilis</i> IS75 | This study |
| <b>BD4406</b> | <i>Pxyl-gfp-comK(H160-R176)::amyE(spc), <math>\Delta</math>comK(kan), mc comS-pUB110::pT7T3 19U::comS (phleo)</i>      | <i>B.subtilis</i> IS75 | This study |

## References

- Benson, A. K., and Haldenwang, W. G. (1993). The sigma B-dependent promoter of the *Bacillus subtilis* *sigB* operon is induced by heat shock. *J Bacteriol* *175*, 1929-1935.
- Hahn, J., Luttinger, A., and Dubnau, D. (1996). Regulatory inputs for the synthesis of ComK, the competence transcription factor of *Bacillus subtilis*. *Mol Microbiol* *21*, 763-775.
- Hahn, J., Maier, B., Haijema, B. J., Sheetz, M. P., and Dubnau, D. (2005). Transformation proteins and DNA uptake localize to the cell poles in *Bacillus subtilis*. *Cell* *122*, 1-13.
- Hamoen, L. W., Smits, W. K., de Jong, A., Holsappel, S., and Kuipers, O. P. (2002). Improving the predictive value of the competence transcription factor (ComK) binding site in *Bacillus subtilis* using a genomic approach. *Nucleic Acids Res* *30*, 5517-5528.
- Lewis, P. J., and Marston, A. L. (1999). GFP vectors for controlled expression and dual labelling of protein fusions in *Bacillus subtilis*. *Gene* *227*, 101-110.
- Luttinger, A., Hahn, J., and Dubnau, D. (1996). Polynucleotide phosphorylase is necessary for competence development in *Bacillus subtilis*. *Mol Microbiol* *19*, 343-356.
- Persuh, M., Turgay, K., Mandic-Mulec, I., and Dubnau, D. (1999). The N- and C-terminal domains of MecA recognize different partners in the competence molecular switch. *Mol Microbiol* *33*, 886-894.

**Fig. S1.** GFP-K17 is degraded in vivo in the presence of MecA: microscopic confirmation. Strains expressing GFP-K17 in *mecA* and *mecA*<sup>+</sup> backgrounds were visualized by fluorescence and differential interference contrast (DIC) microscopy. Cells were prepared for microscopy and examined as described previously (Hahn et al., 2005).

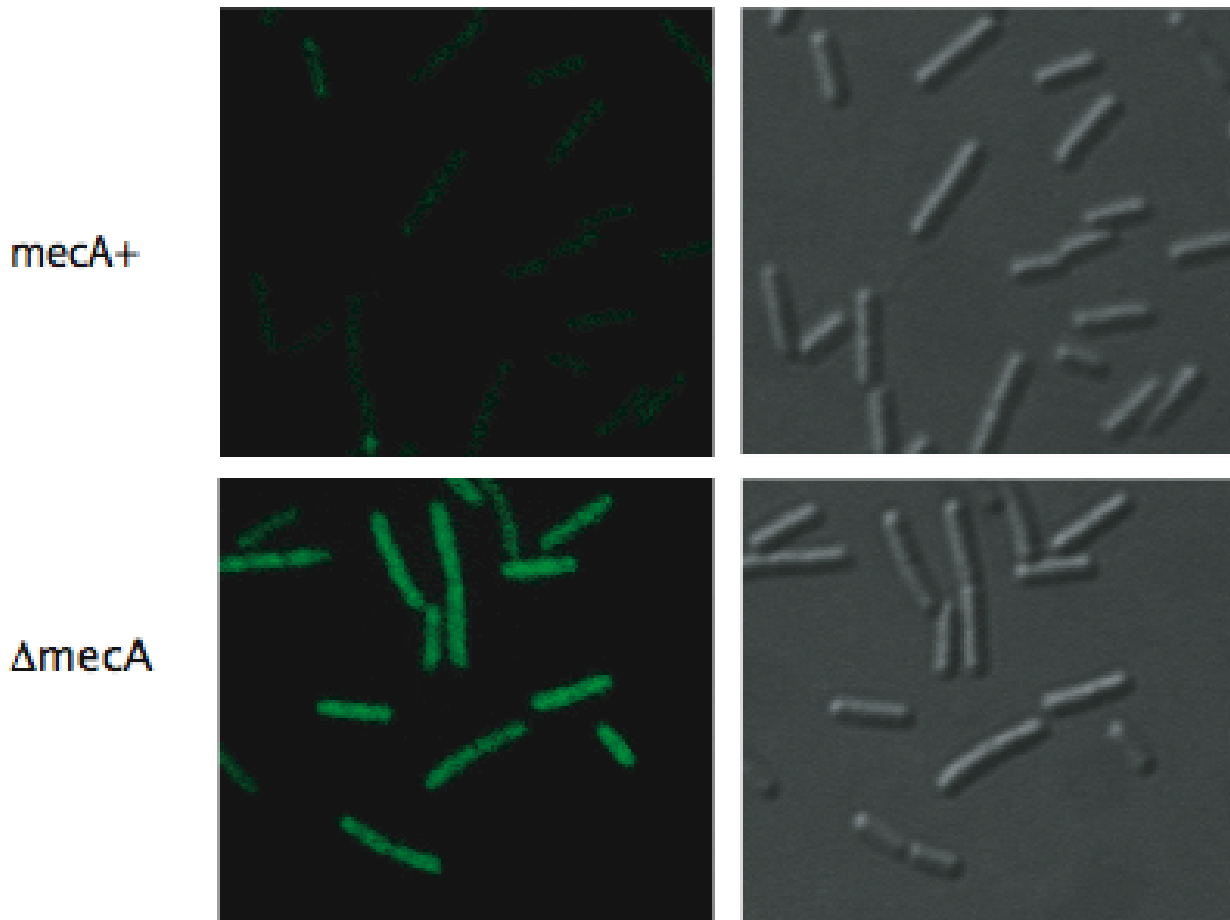

**Fig. S2.** Secondary structure prediction and alignment of ComK sequences. The secondary structure of the C-terminal 57 residues of ComK was predicted using Predict Protein (<http://www.predictprotein.org>) (Fig. S2A). The residues in the K17 peptide are in boldface and the minimal sequence for binding to MecA is underlined. Alignments of the C-terminal predicted sequences of ComK from the indicated species (using CLUSTAL W) are also shown (Fig. S2B). The residues involved in binding to MecA from *B. subtilis* ComK are in boldface as are the equivalent residues from *B. licheniformis*.

## A

136-SYNSFENQVYRTAWLRTKFDQDRID**HRVPKRQEFMLYPKEER**TKMIYDFILRELGERY-192  
 ----HHHHHHHHHHHHHHHHHHHH---LLL---EEE-LLHHHH-HHHHHHHHHHH--LL

## B

|                                    |                                                                                         |
|------------------------------------|-----------------------------------------------------------------------------------------|
| <i>B. subtilis</i>                 | TFSNGKTMELPISYNSFENQVYRTAWLRTKFDQDRID-HRVP <b>KRQEFMLYPKEER</b> TKMIYDFILRELGERY--- 192 |
| <i>B. licheniformis</i> ATCC14580  | TFVNGETLELPVSISSFENQVYRTAWLRTKFDRIEGNPMQ <b>KKQEFMLYPKED</b> RNQLIYEFILRELKKRY--- 192   |
| <i>G. kaustophilus</i> HTA426      | YFRNGKSISLDVSCSFINQLYRTAQLRRTKLSERMEARERKLQYIFRMQQEKQS----- 185                         |
| <i>B. weihenstephanensis</i> KBAB4 | RFINGFAVKLEMSKSSFENQQNRTAKLRTEYEDRKKKQGNPCFKEIDKNEESKLTPAYEKVYFVKEGEV---- 193           |
| <i>B. cereus</i> NVH 391-98        | RFINGFAVKLEMSKSSFENQQNRTAKLRTEYEDRDKQGNLQFKPVAKEAISTLRPAYEKVYLVKEEDIEGE- 196            |
| <i>O. iheyensis</i> HTE831         | LFKNGSKISLDISHGSLINQLQRTAQIRFLDDRIKRWRKPPHSEDDKDS----- 169                              |
|                                    | * ** :.* :* *: ** *** :* :* .                                                           |
